# Supplementary material
Source: PubMed Central journal article supplement (PMC5994369)

# Supplementary Figure 1

A

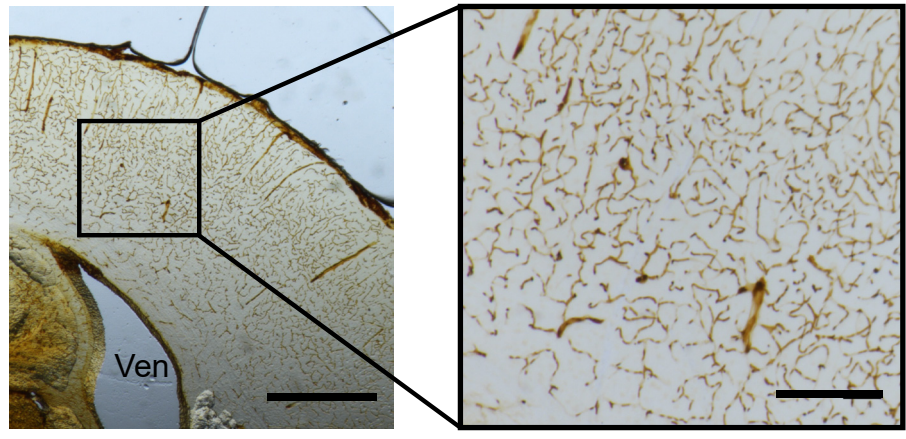

B

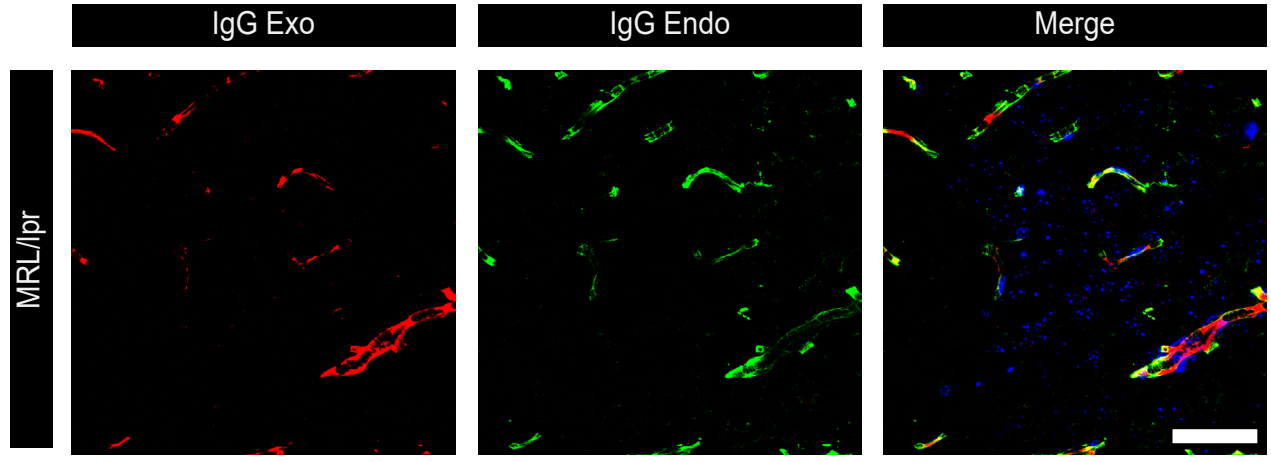

C

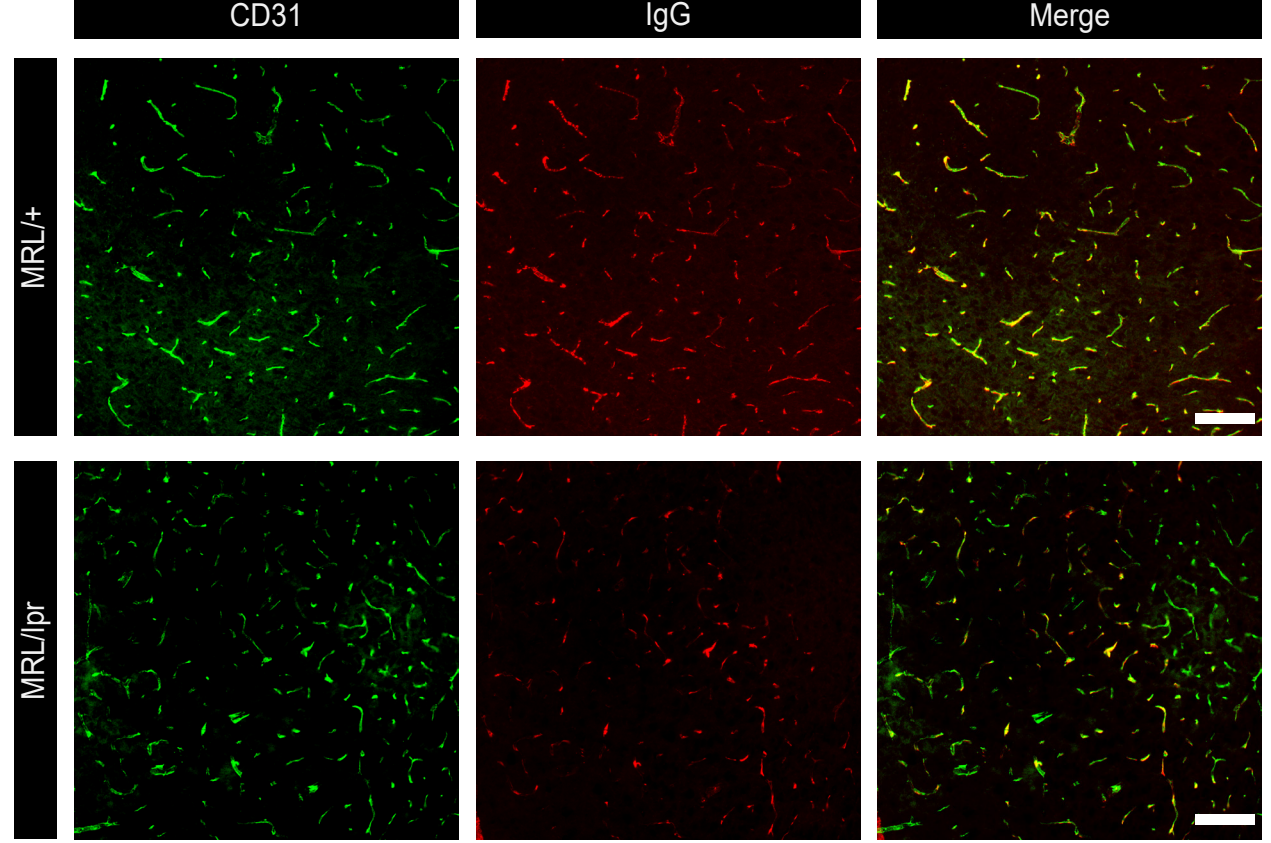

Supplementary Figure 2

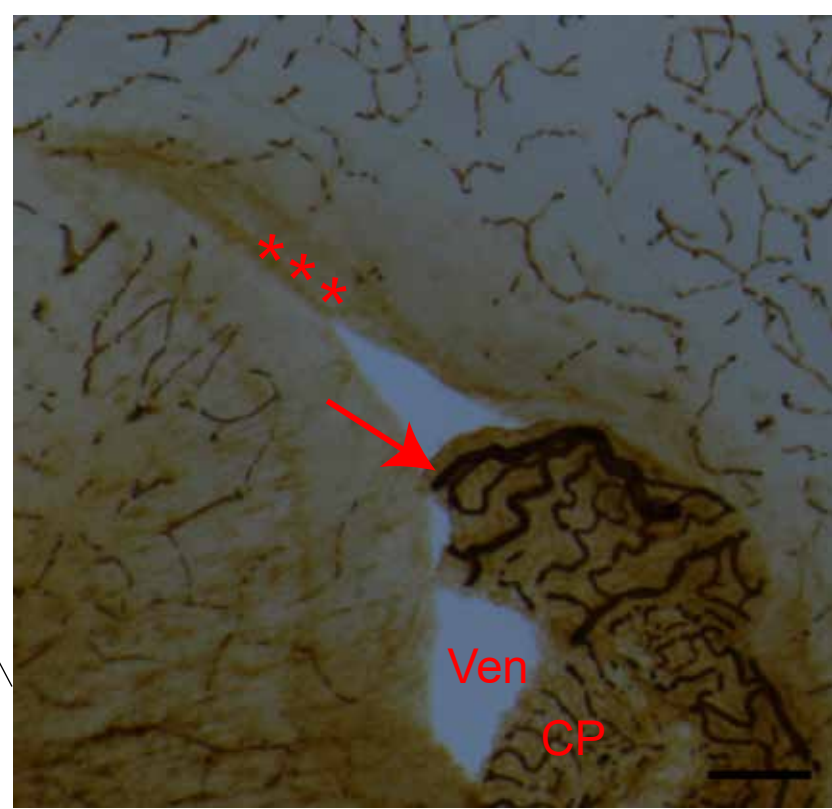

Supplement: NIHMS957886-supplement.pdf [file NIHMS957886-supplement.pdf]
